# Supplementary material
Source: PubMed Central journal article supplement (PMC4346377)
Supplement: Supp_Fig2.pdf [file Supp_Fig2.pdf]

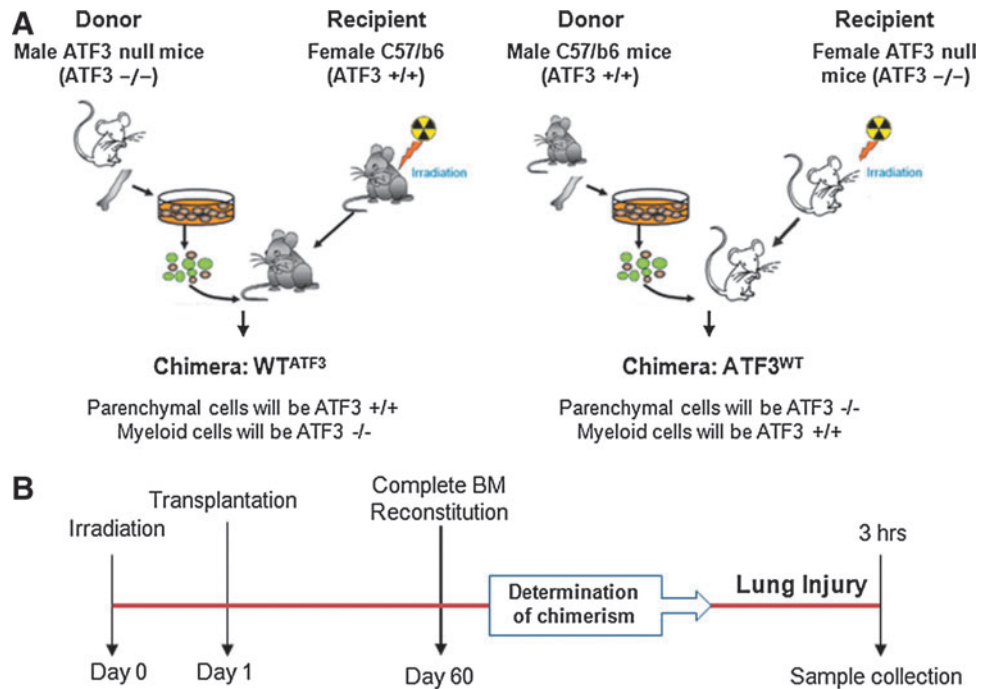

**SUPPLEMENTARY FIG. S2. *In vivo* experimental design.** (A) Schematic of chimera generation. Recipient female mice (either C57BL/6 wild-type ATF3  $+/+$  or ATF3 null mice, ATF3  $-/-$ ) underwent whole body irradiation followed by bone marrow transplantation. Donors were male mice (ATF3 null mice, ATF3  $-/-$  or C57BL/6 wild-type mice, ATF3  $+/+$ ). From these two strains, four groups of chimeric mice were generated: ATF3-positive control (WT mice reconstituted with WT BM, WT<sup>WT</sup>), ATF3-negative control (ATF3  $-/-$  mice reconstituted ATF3  $-/-$  BM, with ATF3<sup>ATF3</sup>), ATF3 myeloid negative group (WT mice reconstituted with ATF3  $-/-$  BM, WT<sup>ATF3</sup>), and ATF3 myeloid positive group (ATF3  $-/-$  mice reconstituted with WT BM, ATF3<sup>WT</sup>). (B) After marrow transplantation, 60 days is the optimal length of time required for full repopulation of the lungs with donor macrophages (38). On day 61 after bone marrow transplantation, mice were randomized into the lung injury protocol.
