# Supplementary material
Source: PubMed Central journal article supplement (PMC4346377)
Supplement: Supp_Fig3.pdf [file Supp_Fig3.pdf]

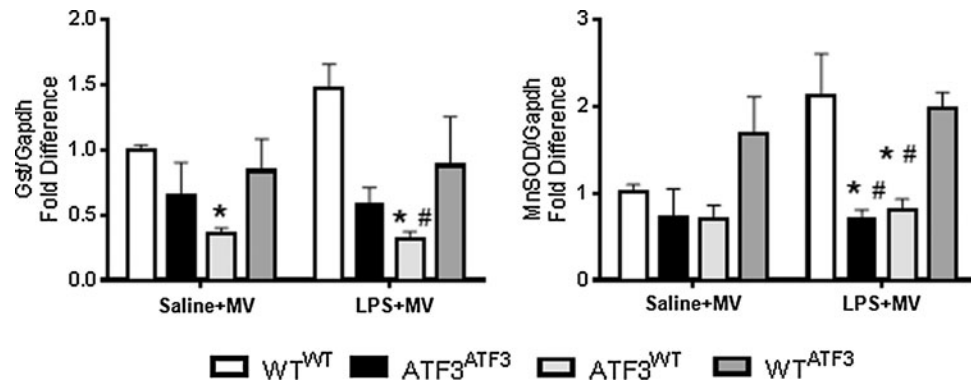

**SUPPLEMENTARY FIG. S3. Expression of antioxidant genes in chimeras.** Bar graph showing quantitative real-time PCR (qRT-PCR) results for glutathione transferase (*GST*) and manganese super-oxide dismutase (*MnSOD*) gene expression in lung tissues collected from chimeric mice exposed to one- (saline + MV) and two- (LPS + MV) hit models of ALI. mRNA expression for both genes is decreased in mice that completely lack ATF3 (ATF3<sup>ATF3</sup>) or lack it only in pulmonary parenchymal cells (ATF3<sup>WT</sup>). Data are presented as means ± SEM. \**p* < 0.05 versus corresponding WT<sup>WT</sup> control, and #*p* < 0.05 versus corresponding experimental chimera.
