# Supplementary material
Source: PubMed Central journal article supplement (PMC4346377)
Supplement: Supp_Table1.pdf [file Supp_Table1.pdf]

SUPPLEMENTARY TABLE S1. DETAILED LUNG INJURY SCORE

| <i>Groups</i> | <i>Cumulative LIS Ave</i> | <i>SEM (±)</i> | <i>LIS</i> | <i>ASI</i> | <i>PVI</i> | <i>BALT</i> | <i>EE</i> | <i>HI</i> | <i>AT</i> | <i>Loss of barrier function</i> | <i>Cellular infiltration</i> | <i>Total infiltration vs. edema</i> | <i>SEM (±)</i> |
|---------------|---------------------------|----------------|------------|------------|------------|-------------|-----------|-----------|-----------|---------------------------------|------------------------------|-------------------------------------|----------------|
| WT/WT-SAL     | 8                         | 1.1            | 4          | 1          | 1          | 0           | 1         | 1         | 0         | 2                               | 2                            | 4                                   | 1.0            |
| ATF3/ATF3-SAL | 14                        | 1.0            | 7          | 1          | 2          | 0           | 1         | 2         | 1         | 4                               | 3                            | 7                                   | 1.2            |
| WT/ATF3-SAL   | 17                        | 0.8            | 9          | 3          | 3          | 1           | 0         | 1         | 0         | 1                               | 7                            | 8                                   | 1.1            |
| ATF3/WT-SAL   | 17                        | 1.2            | 9          | 0          | 2          | 0           | 3         | 3         | 1         | 6                               | 2                            | 8                                   | 0.9            |
| WT/WT-LPS     | 14                        | 1.5            | 6          | 1          | 2          | 1           | 1         | 2         | 1         | 4                               | 4                            | 8                                   | 1.3            |
| ATF3/ATF3-LPS | 28                        | 0.9            | 14         | 3          | 3          | 1           | 2         | 3         | 2         | 7                               | 7                            | 14                                  | 0.8            |
| ATF3/WT-LPS   | 33                        | 1.3            | 17         | 2          | 3          | 0           | 4         | 3         | 4         | 12                              | 4                            | 16                                  | 1.3            |
| WT/ATF3-LPS   | 33                        | 1.3            | 17         | 4          | 4          | 1           | 3         | 3         | 1         | 3                               | 13                           | 16                                  | 1.3            |

Summary of results from detailed pathological examination of chimera lung injury samples.

ASI, alveolar septal cellular infiltration; AT, alveolar septum thickening; BALT, bronchus-associated lymphoid tissue aggregates; EE, exudative edema; HI, hemorrhagic infiltration; LIS, lung injury scores; PVI, perivascular inflammatory infiltrates.
